# Supplementary material for: A facile synthesis of dibenzopyrroloazepinones as tetracyclic allocolchicinoids—an unusual 1,2-phenyl shift
Source: Royal Society of Chemistry journal article supplement (doi:10.1039/b919114c), 2009-11-30
Supplement: b919114c.pdf [file b919114c.pdf]

## Supplementary data

### Studies Towards the Synthesis of Tetracyclic Allocolchicinoids – an Unusual 1,2-Aromatic Shift.

Frank D. King,\* Abil Aliev, Stephen Caddick, Richard Fitz-Maurice, Derek A. Tocher, and Liang Wu

*Department of Chemistry, University College London, 20 Gordon Street, London WC1H 0AJ, U.K..*

#### 2-iodo-4,5-dimethoxybenzoic acid

A solution of  $\text{NaNO}_2$  (2.3 g, 33 mmol) in water (15 mL), was added dropwise to a cooled ( $0^\circ\text{C}$ ) suspension of 2-amino-4,5-dimethoxybenzoic acid (6.0 g, 30 mmol) in 25% aqueous HCl (45 mL) and the mixture was stirred at  $0^\circ\text{C}$  for 20 min. The reaction mixture was then added in one portion to a cooled solution of KI (10 g, 60 mmol) in water (30 mL) and the reaction mixture warmed to  $70^\circ\text{C}$  until evolution of gas ceased. On cooling to ambient temperatures, the solid precipitate was collected and washed with water (15 mL). The solid was dissolved in  $\text{Et}_2\text{O}:\text{DCM}$  (200 mL, 9:1 mixture) and the solution washed with 2M  $\text{NaHSO}_3$  (2 x 50 mL), brine (50 mL) and dried ( $\text{MgSO}_4$ ). Filtration and removal of solvents *in vacuo* gave crude 2-iodo-4,5-dimethoxybenzoic acid (5.5 g, 60% yield) as a pale brown solid, which was used without further purification.  $^1\text{H}$  NMR (300 MHz,  $\text{CDCl}_3$ ):  $\delta$  3.92 (s, 3H), 3.94 (s, 3H), 7.44 (s, 1H), 7.62 (s, 1H).  $^{13}\text{C}$  NMR (75 MHz,  $\text{CDCl}_3$ ):  $\delta$  56.1 ( $\text{CH}_3$ ), 56.3 ( $\text{CH}_3$ ), 85.7 (C), 114.6 (CH), 124.2 (CH), 124.3 (C), 148.7 (C), 152.6 (C), 170.3 (C).

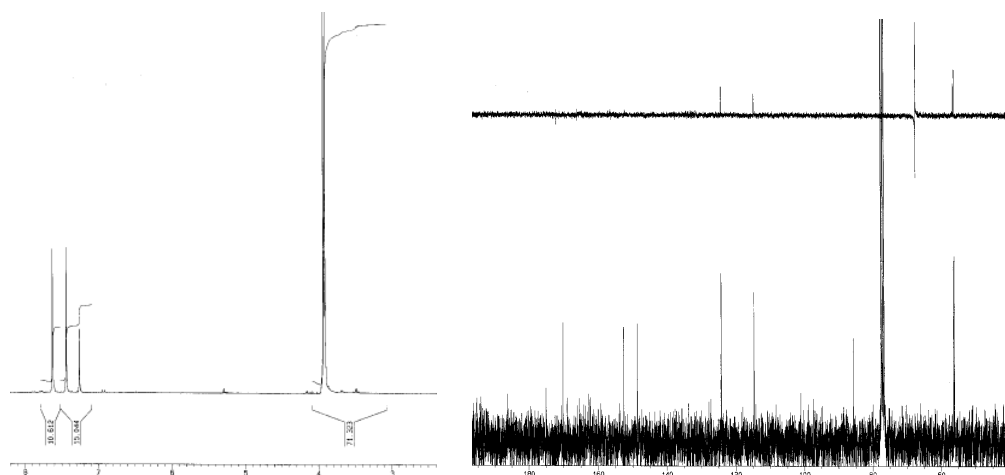

#### Methyl-2-iodo-4,5-dimethoxybenzoate

$\text{SOCl}_2$  (1.8 mL, 24 mmol) was added dropwise to a cooled ( $0^\circ\text{C}$ ) mixture of crude 2-iodo-4,5-dimethoxybenzoic acid (5.0 g, 16 mmol) in MeOH (50 mL). The mixture was heated under reflux for 2h during which time all solids dissolved. MeOH was removed *in vacuo*, the residue treated with water and product extracted with EtOAc (3 x 50 mL). The combined organic extracts were washed with 2M  $\text{NaHSO}_3$  (50 mL), brine (50 mL) and dried over  $\text{MgSO}_4$ . Filtration and removal of solvent gave crude material, which was purified by column chromatography on silica (eluent: 1:1  $\text{Et}_2\text{O}:\text{petrol}$ ). Relevant fractions were collected and solvents removed *in vacuo* to give methyl-2-iodo-4,5-dimethoxybenzoate (4.83 g 93% yield) as a pale yellow solid; mp  $103\text{--}105^\circ\text{C}$  (found) (lit.  $105\text{--}107^\circ\text{C}$  ref),  $^1\text{H}$  NMR (300 MHz,  $\text{CDCl}_3$ ):  $\delta$  3.90 (s, 3H), 3.91 (s, 3H), 3.91 (s, 3H), 7.39 (s, 1H), 7.42 (s, 1H).  $^{13}\text{C}$  NMR (75 MHz,  $\text{CDCl}_3$ ):  $\delta$  52.3 ( $\text{CH}_3$ ), 56.0 ( $\text{CH}_3$ ), 56.3 ( $\text{CH}_3$ ), 84.7 (C), 113.9 (CH), 123.7 (CH), 126.1 (C), 148.7 (C), 151.9 (C), 165.9 (C).

Methyl 2-iodo-5-methoxybenzoate

The figure displays two NMR spectra for compound 1. The left spectrum is the  $^1\text{H}$  NMR spectrum, showing peaks at  $\delta$  9.07, 12.36, 10.95, 0.00, and 3.72. The right spectrum is the  $^{13}\text{C}$  NMR spectrum, showing peaks at  $\delta$  165, 150, 140, 130, 120, 100, and 50.

A mixture of the iodo-benzoate ester (2 mmol), aryl boronic acid (2.4 mmol), [BMIM][Cl] (0.1 mmol),  $\text{PPh}_3$  (0.1 mmol), and  $\text{Na}_2\text{CO}_3$  (4 mmol) in water (1.5 mL) and DMF (3.5 mL) was degassed and flushed with Ar (3 times).  $\text{Pd}(\text{OAc})_2$  (25  $\mu\text{mol}$ ) was added in one portion and the mixture heated under reflux for 18 h. On cooling to ambient temperatures, the reaction mixture was diluted with water (20 mL) and product extracted with  $\text{Et}_2\text{O}$  (3 x 20 mL). Combined organic layers were washed with 0.2M LiCl (20 mL) and brine (20 mL), and dried over  $\text{MgSO}_4$ . Filtration and removal of solvents *in vacuo* gave biaryl esters, used without further purification.

Isolated as a pale yellow oil (quantitative yield). IR (CHCl<sub>3</sub>): 2950, 2837, 1716, 1597, 1572, 1431, 1221, 1121, 1088, 1047, 1028, 711, 671, 559. <sup>1</sup>H NMR (300 MHz, CDCl<sub>3</sub>): δ 3.6 (s, 3H), 3.72 (s, 3H), 6.90 (d, *J* = 7.6 Hz, 1H), 7.24 (t, *J* = 7.9 Hz, 1H), 7.25 (m, 1H), 7.33 (m, 2H), 7.49 (dd, *J* = 7.9 Hz, 1.3 Hz, 1H), 7.55 (t, *J* = 6.9 Hz, 1H), 7.86 (dd, *J* = 7.7, 1.3 Hz, 1H).

$^{13}\text{C}$  NMR (75 MHz,  $\text{CDCl}_3$ ):  $\delta$  51.7 ( $\text{CH}_3$ ), 55.3 ( $\text{CH}_3$ ), 110.2 (CH), 120.8 (CH), 127.2 (CH), 128.9 (CH), 129.4 (CH), 130.0 (CH), 130.6 (C), 131.4 (CH), 131.7 (CH), 138.8 (C), 156.1 (C), 168.7 (C). LRMS (EI):  $m/z$  242  $[\text{M}]^+$ , 211  $[\text{M}-\text{OMe}]^+$ . (ref. Kemperman G.J., Ter Horst, B., Van de Goor, D., Roeters, T., Bergwerff, J., Van der Eem, R. and Basten, J. *Eur. J. Chem.* **2006**, 3169-3174).

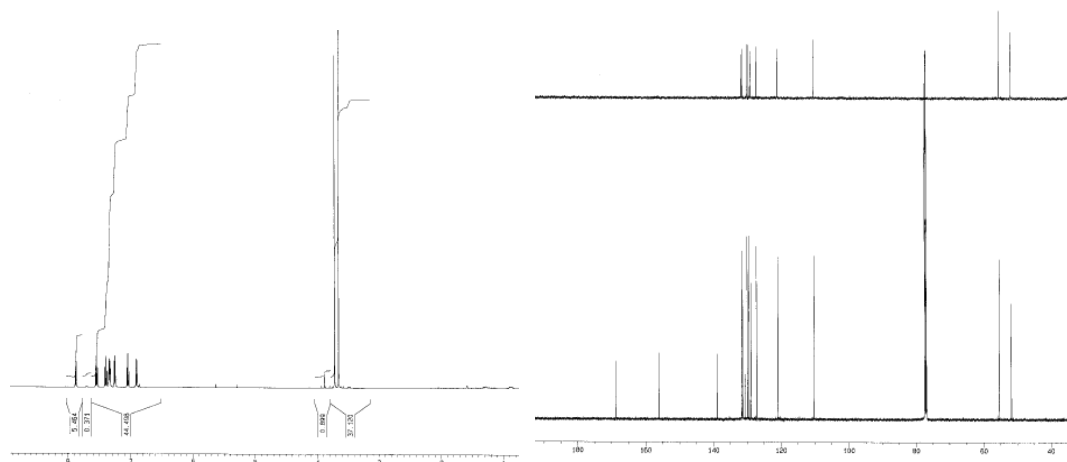

#### Methyl 2',4,5-trimethoxybiphenyl-2-carboxylate

Isolated as a pale yellow oil (quantitative yield).  $^1\text{H}$  NMR (300 MHz,  $\text{CDCl}_3$ ):  $\delta$  3.62 (s, 3H), 3.73 (s, 3H), 3.91 (s, 3H), 3.96 (s, 3H), 6.78 (s, 1H), 6.91 (d,  $J = 8.1$  Hz, 1H), 7.03 (t,  $J = 7.4$  Hz, 1H), 7.22 (dd,  $J = 7.5, 1.8$  Hz, 1H), 7.33 (td,  $J = 7.6, 1.1$  Hz, 1H), 7.47 (s, 1H).  $^{13}\text{C}$  NMR (75 MHz,  $\text{CDCl}_3$ ):  $\delta$  51.6 ( $\text{CH}_3$ ), 55.4 ( $\text{CH}_3$ ), 56.0 ( $\text{CH}_3$ ), 56.1 ( $\text{CH}_3$ ), 110.2 (CH), 112.5 (CH), 114.1 (CH), 120.6 (CH), 123.1 (C), 128.6 (CH), 129.8 (CH), 130.9 (C), 133.1 (CH), 147.5 (C), 151.4 (C), 156.3 (C), 167.9 (C).

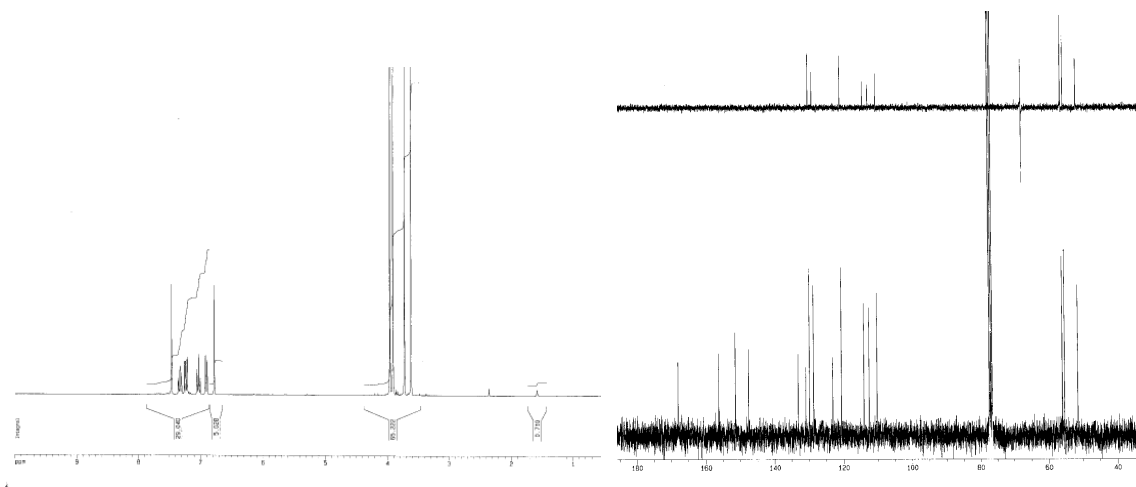

#### Methyl 2',3',4,5-tetramethoxybiphenyl-2-carboxylate

Isolated as a yellow oil which solidified on standing (quantitative yield); mp 100-102 °C. IR ( $\text{CHCl}_3$ ): 2939, 1713, 1604, 1574, 1518, 1472, 1435, 1263, 1169, 1083.  $^1\text{H}$  NMR (300 MHz,  $\text{CDCl}_3$ ):  $\delta$  3.51 (s, 3H), 3.64 (s, 3H), 3.89 (s, 6H), 3.96 (s, 3H), 6.79 (dd,  $J = 7.7, 1.5$  Hz, 1H), 6.80 (s, 1H), 6.92 (dd,  $J = 8.2, 1.4$  Hz, 1H), 7.07 (t,  $J = 8.16$  Hz, 1H), 7.48 (s, 1H).  $^{13}\text{C}$  NMR (75 MHz,  $\text{CDCl}_3$ ):  $\delta$  51.7 ( $\text{CH}_3$ ), 55.9 ( $\text{CH}_3$ ), 56.1 ( $\text{CH}_3$ ), 60.3 ( $\text{CH}_3$ ), 111.5 (CH), 112.6 (CH), 114.0 (CH), 122.1 (CH), 122.6 (C), 123.6 (CH), 133.2 (C), 136.1 (C), 146.0 (C), 147.7 (C), 151.1 (C), 152.5 (C), 167.7 (C). LRMS (EI):  $m/z$  332  $[\text{M}]^+$ , 301  $[\text{M}-\text{OMe}]^+$ .

Isolated as an orange oil which solidified on standing (quantitative yield); mp 98–100 °C. IR (CHCl<sub>3</sub>): 2941, 2833, 1718, 1697, 1604, 1577, 1499, 1466, 1437, 1348, 1271, 1163, 1051, 1028. <sup>1</sup>H NMR (500 MHz, CDCl<sub>3</sub>): δ 3.63 (s, 3H), 3.66 (s, 3H), 3.80 (s, 3H), 3.90 (s, 3H), 3.95 (s, 3H), 6.78 (s, 1H), 6.85 (s, 3H), 7.45 (s, 1H). <sup>13</sup>C NMR (126 MHz, CDCl<sub>3</sub>): δ 51.7 (CH<sub>3</sub>), 55.8 (CH<sub>3</sub>), 56.0 (CH<sub>3</sub>), 56.1 (CH<sub>3</sub>), 56.2 (CH<sub>3</sub>), 112.5 (CH), 112.6 (CH), 114.0 (CH), 116.4 (CH), 118.6 (CH), 123.2 (C), 131.9 (C), 132.8 (C), 147.7 (C), 150.7 (C), 151.5 (C), 153.6 (C), 167.9 (C). LRMS (EI): m/z 332 [M]<sup>+</sup>, 301 [M-OMe]<sup>+</sup>.

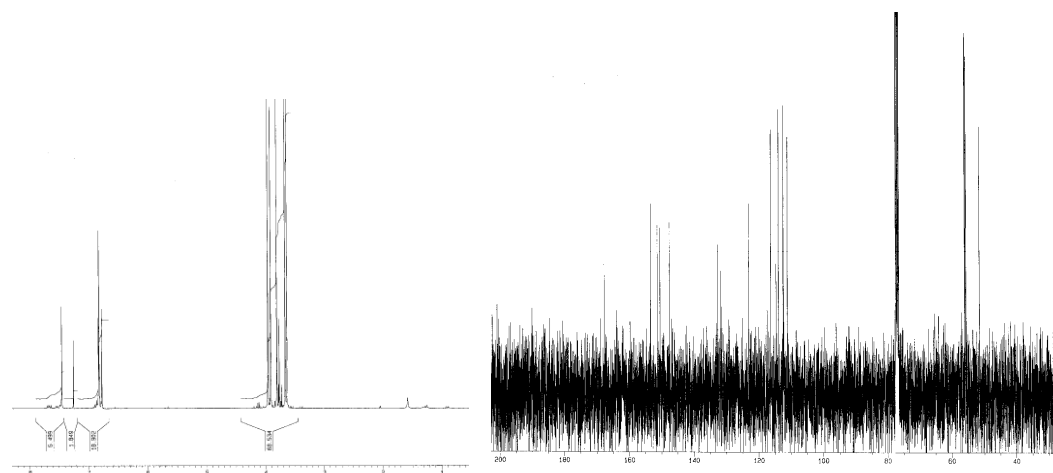

Isolated as a pale yellow solid (quantitative yield); mp 87-90 °C. IR (neat): 2936, 1736, 1595, 1563, 1257. <sup>1</sup>H NMR (300 MHz, CDCl<sub>3</sub>): δ 3.57 (s, 3H), 3.65 (s, 3H), 3.90 (s, 6H), 3.91 (s, 3H), 3.96 (s, 3H), 6.71 (d, *J* = 8.5 Hz, 1H), 6.77 (s, 1H), 6.93 (d, *J* = 9.5 Hz, 1H), 7.46 (s, 1H). <sup>13</sup>C NMR (75 MHz, CDCl<sub>3</sub>): δ 51.8 (CH<sub>3</sub>), 56.0 (CH<sub>3</sub>), 56.0 (CH<sub>3</sub>), 56.1 (CH<sub>3</sub>), 60.7 (CH<sub>3</sub>), 61.0 (CH<sub>3</sub>), 106.8 (CH), 112.7 (CH), 114.1 (CH), 122.9 (C), 124.0 (CH), 128.7 (C), 132.9 (C), 141.9 (C), 147.6 (C), 151.0 (C), 151.2 (C), 153.1 (C), 168.0 (C). LRMS (EI): *m/z* 362 [M]<sup>+</sup>, 331 [M-OMe]<sup>+</sup>.

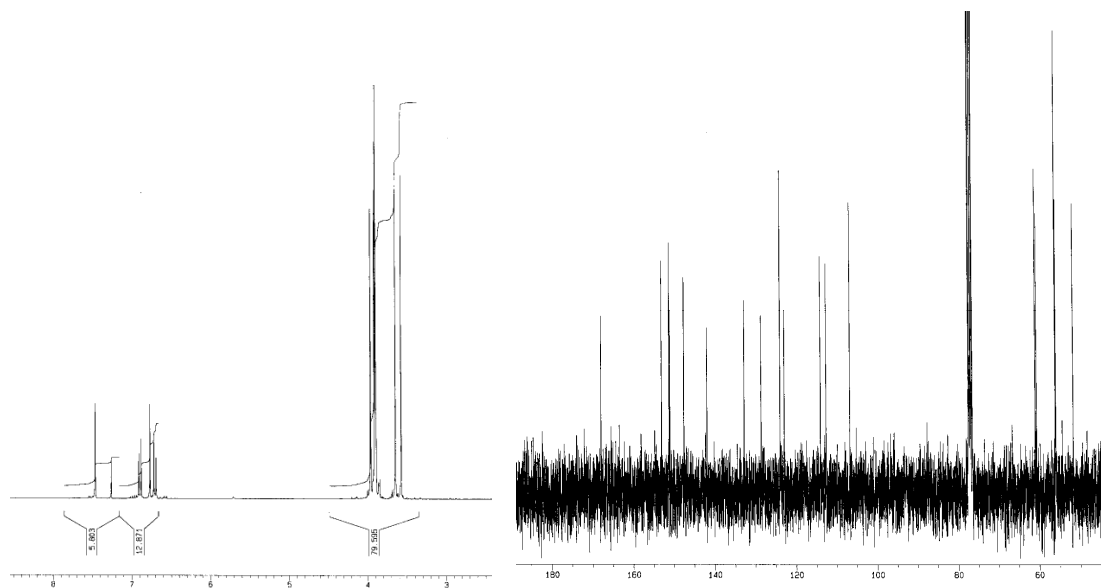

#### Methyl 2',3',4',4'-tetramethoxybiphenyl-2-carboxylate

Isolated as a pale yellow oil (quantitative yield) which solidified on standing (Mpt 95–7°C, Lit 100°C: Y. Itoh, A. Brossi *Helv Chem Acta* 1989, 72, 196-204). IR (Neat) 2937, 2838, 1723, 1599, 1460, 1438, 1294, 1257, 1212, 1068, 1039, 1006, 816, 784, 702. <sup>1</sup>H NMR (300 MHz, CDCl<sub>3</sub>): δ = 3.52 (s, 3H), 3.66 (s, 3H), 3.89 (s, 3H), 4.10 (s, 3H), 4.12 (s, 3H), 6.70 (d, *J* = 8.5 Hz, 1H), 6.90 (d, *J* = 8.5 Hz, 1H), 7.06 (dd, *J* = 8.5, 2.5 Hz, 1H), 7.24 (d, *J* = 8.5 Hz, 1H), 7.40 (d, *J* = 2.5 Hz, 1H); <sup>13</sup>C NMR (75 MHz, CDCl<sub>3</sub>): δ = 52.0 (CH<sub>3</sub>), 55.5 (CH<sub>3</sub>), 55.9 (CH<sub>3</sub>), 60.5 (CH<sub>3</sub>), 61.0 (CH<sub>3</sub>), 107.0 (CH), 114.4 (CH), 117.6 (CH), 124.1 (CH), 128.2 (C), 130.7 (C), 132.3 (C), 132.5 (CH), 141.9 (C), 151.0 (C), 153.0 (C), 158.4 (C), 168.6 (C), LRMS (EI): *m/z* 332 [M]<sup>+</sup>, 301 [M-OMe]<sup>+</sup>.

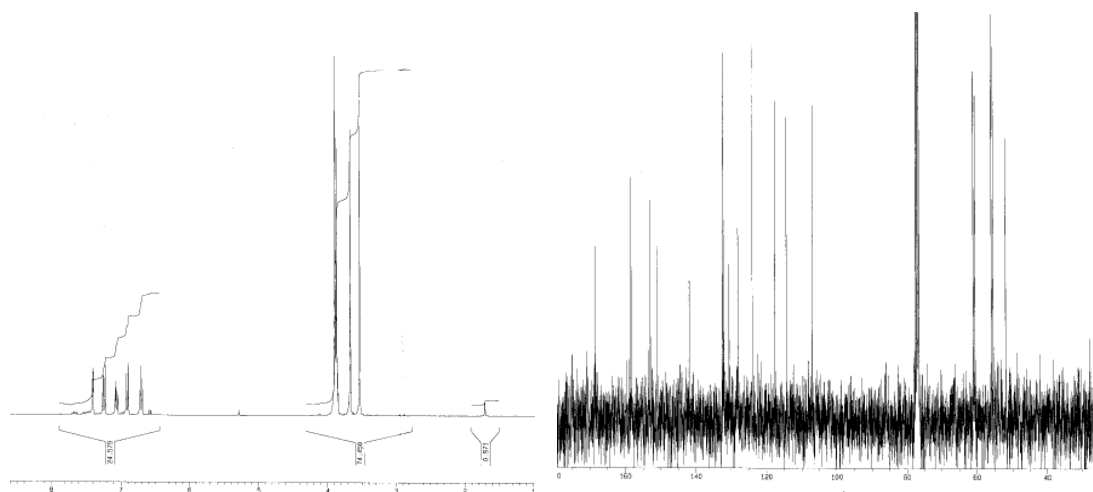

#### Methyl 3',4,4',5'-tetramethoxybiphenyl-2-carboxylate

Isolated as a pale grey solid (mpt 112–4°C) IR (Neat) 3010, 2969, 2938, 2836, 1725, 1584, 1497, 1449, 1430, 1289, 1237, 1215, 1070, 1039, 1000, 881, 822, 781. <sup>1</sup>H NMR (500 MHz, CDCl<sub>3</sub>): δ = 3.66 (s, 3H), 3.85 (2, 6H), 3.87 (s, 3H), 3.88 (s, 3H), 6.50 (s, 2H), 7.05 (dd, *J* = 2.8, 8.5 Hz, 1H), 7.26 (d, *J* = 2.8 Hz, 1H), 7.31 (d, *J* = 8.5 Hz, 1H), 3.88 (s, 3H), 3.87 (s, 3H), 3.85 (s, 6H), 3.66 (s, 3H); <sup>13</sup>C NMR (125 MHz, CDCl<sub>3</sub>): δ = 52.3 (CH<sub>3</sub>), 55.7 (CH<sub>3</sub>), 56.2 (CH<sub>3</sub>), 61.0 (CH<sub>3</sub>), 105.7 (CH), 114.2 (CH), 117.4 (CH), 131.6 (CH), 132.2 (C), 134.5 (C), 136.7 (C), 137.2 (C), 153.0 (C), 158.7 (C), 169.4 (C), 171.6 (C), LRMS (EI): *m/z* 332 [M]<sup>+</sup>, 301 [M-OMe]<sup>+</sup> (ref.IR. Baxendale, C.M. Griffiths-Jones, S.V. Ley, G.K. Tranmer, *Chem. Eur. J.* **2006**, 12, 4407-4416: 40% pure)
